# Supplementary material for: Organizational culture and climate as moderators of enhanced outreach for persons with serious mental illness: results from a cluster-randomized trial of adaptive implementation strategies
Source: PubMed Central journal article supplement (PMC6038326; doi:10.1186/s13012-018-0787-9), 2018-07-09
Supplement: 13012_2018_787_MOESM1_ESM.pdf [file 13012_2018_787_MOESM1_ESM.pdf]

**Table S1: Updated documentation**

| Updated Documentation                                                           | Entrepreneurial<br>Culture<br>OR (.95 CI) | Hierarchical<br>Culture<br>OR (.95 CI) | Task<br>Climate<br>OR (.95 CI) | Relational<br>Climate<br>OR (.95 CI) |
|---------------------------------------------------------------------------------|-------------------------------------------|----------------------------------------|--------------------------------|--------------------------------------|
| Immediate vs. Delayed EREP                                                      | 0.20 (0.05,0.73)                          | 0.16 (0.04,0.62)                       | 0.15 (0.04,0.56)               | 0.16 (0.04,0.60)                     |
| Culture/Climate (standardized)                                                  | 0.53 (0.26,1.08)                          | 0.45 (0.21,0.96)                       | 0.68 (0.34,1.33)               | 0.69 (0.35,1.34)                     |
| Immediate vs. Delayed EREP × Culture/Climate                                    | 1.00 (0.37,2.71)                          | 1.94 (0.71,5.33)                       | 0.78 (0.27,2.24)               | 0.94 (0.33,2.68)                     |
| Time                                                                            |                                           |                                        |                                |                                      |
| 6 months (vs. 0 months)                                                         | 4.18* (3.36,5.20)                         | 4.18* (3.36,5.20)                      | 4.33* (3.46,5.43)              | 4.25* (3.39,5.32)                    |
| 12 months (vs. 0 months)                                                        | 19.74* (15.62,24.95)                      | 20.14* (15.91,25.49)                   | 19.67* (15.44,25.04)           | 19.23* (15.11,24.47)                 |
| Immediate vs. Delayed EREP × Time                                               |                                           |                                        |                                |                                      |
| 6 months (vs. 0 months)                                                         | 8.24* (5.74,11.83)                        | 8.88* (6.14,12.83)                     | 9.69* (6.58,14.27)             | 10.10* (6.83,14.95)                  |
| 12 months (vs. 0 months)                                                        | 5.91* (3.99,8.76)                         | 7.03* (4.68,10.56)                     | 7.05* (4.63,10.73)             | 7.72* (5.04,11.84)                   |
| Culture/Climate × Time                                                          |                                           |                                        |                                |                                      |
| 6 months (vs. 0 months)                                                         | 1.09 (0.87,1.37)                          | 1.38 (1.10,1.73)                       | 0.86 (0.69,1.08)               | 0.94 (0.74,1.18)                     |
| 12 months (vs. 0 months)                                                        | 1.11 (0.88,1.40)                          | 1.53* (1.22,1.92)                      | 1.02 (0.81,1.28)               | 1.09 (0.86,1.37)                     |
| Immediate vs. Delayed EREP × Culture/Climate × Time                             |                                           |                                        |                                |                                      |
| 6 months (vs. 0 months)                                                         | 2.81* (1.98,3.98)                         | 2.26* (1.59,3.23)                      | 3.05* (2.05,4.55)              | 2.56* (1.72,3.81)                    |
| 12 months (vs. 0 months)                                                        | 2.05* (1.41,2.97)                         | 2.20* (1.51,3.20)                      | 2.00 (1.30,3.08)               | 1.94 (1.27,2.98)                     |
| Baseline Age (centered at 21 years)                                             | 1.00 (1.00,1.00)                          | 1.00 (1.00,1.00)                       | 1.00 (1.00,1.00)               | 1.00 (1.00,1.00)                     |
| Male (vs. Female)                                                               | 1.11 (0.90,1.37)                          | 1.11 (0.90,1.37)                       | 1.11 (0.90,1.37)               | 1.11 (0.89,1.37)                     |
| Black race (vs. other races)                                                    | 1.03 (0.86,1.22)                          | 1.02 (0.86,1.22)                       | 1.02 (0.86,1.22)               | 1.02 (0.86,1.22)                     |
| Married (vs. Unmarried)                                                         | 0.79* (0.68,0.92)                         | 0.79 (0.68,0.92)                       | 0.80 (0.69,0.92)               | 0.80 (0.69,0.92)                     |
| Patient is Service Connected (vs. not Connected)                                | 0.98 (0.85,1.13)                          | 0.98 (0.85,1.13)                       | 0.98 (0.85,1.12)               | 0.98 (0.85,1.12)                     |
| Homeless (vs. not Homeless)                                                     | 1.32* (1.10,1.59)                         | 1.32 (1.10,1.59)                       | 1.32 (1.10,1.59)               | 1.32 (1.10,1.59)                     |
| Serious Mental Illness (vs. not Serious)                                        | 1.02 (0.89,1.17)                          | 1.02 (0.89,1.17)                       | 1.02 (0.89,1.17)               | 1.02 (0.89,1.17)                     |
| Last VA use was inpatient (vs. other service)                                   | 3.05* (2.24,4.16)                         | 3.04* (2.24,4.14)                      | 3.01* (2.21,4.10)              | 3.00* (2.20,4.08)                    |
| Comorbidity                                                                     |                                           |                                        |                                |                                      |
| 1                                                                               | 0.96 (0.81,1.14)                          | 0.96 (0.81,1.14)                       | 0.96 (0.81,1.13)               | 0.96 (0.81,1.13)                     |
| 2                                                                               | 1.08 (0.91,1.29)                          | 1.08 (0.91,1.30)                       | 1.08 (0.91,1.29)               | 1.08 (0.91,1.29)                     |
| 3 or more                                                                       | 1.43* (1.21,1.70)                         | 1.44* (1.21,1.71)                      | 1.43* (1.21,1.70)              | 1.43* (1.21,1.70)                    |
| Facility is CBOC (vs. not CBOC)                                                 | 0.67 (0.13,3.56)                          | 0.86 (0.15,5.00)                       | 0.57 (0.10,3.16)               | 0.65 (0.12,3.60)                     |
| Total number of patients for site<br>(median centered)                          | 1.00 (1.00,1.00)                          | 1.00 (1.00,1.00)                       | 1.00 (1.00,1.00)               | 1.00 (1.00,1.00)                     |
| Total number of eligible patients on patient list for site<br>(median centered) | 0.99 (0.97,1.01)                          | 0.99 (0.97,1.02)                       | 0.99 (0.97,1.01)               | 0.99 (0.97,1.01)                     |
| Bayesian Information Criterion (BIC)                                            | 7241.7                                    | 7218.6                                 | 7271.8                         | 7727.7                               |

\**p* < 0.01

**Table S2: Attempted Contact**

| Attempted Contact                                                               | Entrepreneurial<br>Culture<br>OR (.95 CI) | Hierarchical<br>Culture<br>OR (.95 CI) | Task<br>Climate<br>OR (.95 CI) | Relational<br>Climate<br>OR (.95 CI) |
|---------------------------------------------------------------------------------|-------------------------------------------|----------------------------------------|--------------------------------|--------------------------------------|
| Immediate vs. Delayed EREP                                                      | 0.41 (0.15,1.17)                          | 0.36 (0.12,1.02)                       | 0.34* (0.12,0.99)              | 0.36 (0.12,1.03)                     |
| Culture/Climate (standardized)                                                  | 0.56 (0.31,1.02)                          | 0.56 (0.31,1.03)                       | 0.73 (0.41,1.30)               | 0.71 (0.40,1.25)                     |
| Immediate vs. Delayed EREP × Culture/Climate                                    | 1.63 (0.70,3.79)                          | 2.13 (0.95,4.80)                       | 1.30 (0.53,3.21)               | 1.59 (0.66,3.86)                     |
| Time                                                                            |                                           |                                        |                                |                                      |
| 6 months (vs. 0 months)                                                         | 3.71* (2.93,4.69)                         | 3.65* (2.89,4.61)                      | 3.80* (2.99,4.84)              | 3.71* (2.92,4.71)                    |
| 12 months (vs. 0 months)                                                        | 12.86* (10.16,16.28)                      | 12.70* (10.04,16.07)                   | 12.78* (10.02,16.30)           | 12.35* (9.70,15.73)                  |
| Immediate vs. Delayed EREP × Time                                               |                                           |                                        |                                |                                      |
| 6 months (vs. 0 months)                                                         | 3.38* (2.42,4.74)                         | 3.37* (2.41,4.72)                      | 3.73* (2.64,5.27)              | 3.72* (2.64,5.25)                    |
| 12 months (vs. 0 months)                                                        | 2.35* (1.67,3.31)                         | 2.44* (1.73,3.44)                      | 2.52* (1.76,3.59)              | 2.58* (1.81,3.68)                    |
| Culture/Climate × Time                                                          |                                           |                                        |                                |                                      |
| 6 months (vs. 0 months)                                                         | 1.19 (0.94,1.51)                          | 1.36 (1.06,1.74)                       | 0.89 (0.71,1.13)               | 0.99 (0.77,1.27)                     |
| 12 months (vs. 0 months)                                                        | 1.15 (0.90,1.45)                          | 1.35 (1.06,1.71)                       | 1.02 (0.81,1.29)               | 1.15 (0.90,1.47)                     |
| Immediate vs. Delayed EREP × Culture/Climate × Time                             |                                           |                                        |                                |                                      |
| 6 months (vs. 0 months)                                                         | 1.59* (1.12,2.25)                         | 1.15 (0.82,1.63)                       | 1.65* (1.14,2.38)              | 1.27 (0.88,1.84)                     |
| 12 months (vs. 0 months)                                                        | 0.99 (0.69,1.41)                          | 0.94 (0.67,1.34)                       | 0.98 (0.67,1.43)               | 0.79 (0.55,1.16)                     |
| Baseline Age (centered at 21 years)                                             | 0.99* (0.98,0.99)                         | 0.99* (0.98,0.99)                      | 0.99* (0.98,0.99)              | 0.99* (0.98,0.99)                    |
| Male (vs. Female)                                                               | 0.99 (0.81,1.21)                          | 0.99 (0.81,1.21)                       | 0.99 (0.81,1.21)               | 0.99 (0.81,1.21)                     |
| Black race (vs. other races)                                                    | 1.03 (0.87,1.23)                          | 1.03 (0.87,1.23)                       | 1.03 (0.87,1.23)               | 1.03 (0.87,1.22)                     |
| Married (vs. Unmarried)                                                         | 1.04 (0.90,1.20)                          | 1.04 (0.90,1.20)                       | 1.04 (0.90,1.20)               | 1.04 (0.90,1.20)                     |
| Patient is Service Connected (vs. not Connected)                                | 1.00 (0.87,1.15)                          | 1.00 (0.87,1.15)                       | 1.00 (0.87,1.15)               | 1.00 (0.87,1.15)                     |
| Homeless (vs. not Homeless)                                                     | 0.93 (0.78,1.12)                          | 0.93 (0.78,1.12)                       | 0.93 (0.78,1.12)               | 0.93 (0.78,1.12)                     |
| Serious Mental Illness (vs. not Serious)                                        | 0.87 (0.76,1.00)                          | 0.87 (0.76,1.00)                       | 0.87 (0.76,1.00)               | 0.87 (0.76,1.00)                     |
| Last VA use was inpatient (vs. other service)                                   | 1.99* (1.48,2.69)                         | 2.00* (1.48,2.69)                      | 1.98* (1.47,2.67)              | 1.98* (1.47,2.67)                    |
| Comorbidity                                                                     |                                           |                                        |                                |                                      |
| 1                                                                               | 0.88 (0.75,1.03)                          | 0.88 (0.75,1.04)                       | 0.88 (0.75,1.03)               | 0.88 (0.75,1.03)                     |
| 2                                                                               | 0.99 (0.83,1.17)                          | 0.99 (0.83,1.17)                       | 0.99 (0.83,1.17)               | 0.99 (0.83,1.17)                     |
| 3 or more                                                                       | 0.88 (0.74,1.04)                          | 0.88 (0.74,1.04)                       | 0.88 (0.74,1.04)               | 0.88 (0.74,1.04)                     |
| Facility is CBOC (vs. not CBOC)                                                 | 0.43 (0.10,1.80)                          | 0.50 (0.12,2.09)                       | 0.40 (0.09,1.71)               | 0.42 (0.10,1.80)                     |
| Total number of patients for site<br>(median centered)                          | 1.00 (1.00,1.00)                          | 1.00 (1.00,1.00)                       | 1.00 (1.00,1.00)               | 1.00 (1.00,1.00)                     |
| Total number of eligible patients on patient list for site<br>(median centered) | 0.99 (0.97,1.01)                          | 1.00 (0.98,1.01)                       | 0.99 (0.97,1.01)               | 1.00 (0.98,1.02)                     |
| Bayesian Information Criterion                                                  | 7511.1                                    | 7524.0                                 | 7531.0                         | 7536.5                               |

\* $p < 0.01$

**Table S3: Completed Contact**

| Completed Contact                                                               | Entrepreneurial<br>Culture<br>OR (.95 CI) | Hierarchical<br>Culture<br>OR (.95 CI) | Task<br>Climate<br>OR (.95 CI) | Relational<br>Climate<br>OR (.95 CI) |
|---------------------------------------------------------------------------------|-------------------------------------------|----------------------------------------|--------------------------------|--------------------------------------|
| Immediate vs. Delayed EREP                                                      | 1.00 (0.44,2.28)                          | 0.97 (0.43,2.19)                       | 0.91 (0.39,2.14)               | 0.92 (0.40,2.15)                     |
| Culture/Climate (standardized)                                                  | 0.67 (0.40,1.10)                          | 0.66 (0.40,1.10)                       | 0.96 (0.59,1.57)               | 0.91 (0.55,1.49)                     |
| Immediate vs. Delayed EREP × Culture/Climate                                    | 1.31 (0.65,2.64)                          | 1.84 (0.95,3.60)                       | 0.85 (0.39,1.82)               | 0.98 (0.46,2.08)                     |
| Time                                                                            |                                           |                                        |                                |                                      |
| 6 months (vs. 0 months)                                                         | 2.57* (1.76,3.74)                         | 2.54* (1.74,3.70)                      | 2.60* (1.76,3.85)              | 2.51* (1.71,3.68)                    |
| 12 months (vs. 0 months)                                                        | 5.44* (3.82,7.75)                         | 5.43* (3.82,7.73)                      | 5.66* (3.92,8.16)              | 5.45* (3.81,7.81)                    |
| Immediate vs. Delayed EREP × Time                                               |                                           |                                        |                                |                                      |
| 6 months (vs. 0 months)                                                         | 1.59 (0.96,2.63)                          | 1.58 (0.95,2.62)                       | 1.64 (0.97,2.79)               | 1.66 (0.98,2.78)                     |
| 12 months (vs. 0 months)                                                        | 1.22 (0.76,1.98)                          | 1.24 (0.76,2.00)                       | 1.15 (0.69,1.90)               | 1.18 (0.72,1.94)                     |
| Culture/Climate × Time                                                          |                                           |                                        |                                |                                      |
| 6 months (vs. 0 months)                                                         | 1.23 (0.85,1.78)                          | 1.33 (0.91,1.93)                       | 0.91 (0.63,1.32)               | 1.03 (0.70,1.53)                     |
| 12 months (vs. 0 months)                                                        | 1.07 (0.76,1.52)                          | 1.15 (0.81,1.62)                       | 0.83 (0.58,1.17)               | 0.94 (0.65,1.35)                     |
| Immediate vs. Delayed EREP × Culture/Climate × Time                             |                                           |                                        |                                |                                      |
| 6 months (vs. 0 months)                                                         | 1.07 (0.65,1.77)                          | 0.83 (0.52,1.34)                       | 1.29 (0.74,2.23)               | 1.01 (0.59,1.75)                     |
| 12 months (vs. 0 months)                                                        | 0.92 (0.58,1.48)                          | 0.81 (0.52,1.26)                       | 1.11 (0.66,1.88)               | 0.96 (0.57,1.63)                     |
| Baseline Age (centered at 21 years)                                             | 1.00 (0.99,1.00)                          | 1.00 (0.99,1.00)                       | 1.00 (0.99,1.00)               | 1.00 (0.99,1.00)                     |
| Male (vs. Female)                                                               | 0.89 (0.69,1.16)                          | 0.89 (0.69,1.16)                       | 0.89 (0.69,1.15)               | 0.89 (0.69,1.15)                     |
| Black race (vs. other races)                                                    | 0.96 (0.76,1.22)                          | 0.96 (0.76,1.23)                       | 0.96 (0.76,1.22)               | 0.96 (0.76,1.22)                     |
| Married (vs. Unmarried)                                                         | 1.41* (1.18,1.68)                         | 1.41* (1.18,1.69)                      | 1.41* (1.18,1.68)              | 1.41* (1.18,1.68)                    |
| Patient is Service Connected (vs. not Connected)                                | 1.29* (1.08,1.54)                         | 1.29* (1.08,1.54)                      | 1.29* (1.08,1.54)              | 1.29* (1.08,1.54)                    |
| Homeless (vs. not Homeless)                                                     | 0.48* (0.35,0.65)                         | 0.48* (0.35,0.65)                      | 0.48* (0.35,0.65)              | 0.48* (0.35,0.65)                    |
| Serious Mental Illness (vs. not Serious)                                        | 0.73* (0.61,0.88)                         | 0.73* (0.61,0.88)                      | 0.73* (0.61,0.88)              | 0.73* (0.61,0.88)                    |
| Last VA use was inpatient (vs. other service)                                   | 0.69 (0.43,1.10)                          | 0.69 (0.43,1.10)                       | 0.69 (0.43,1.10)               | 0.69 (0.43,1.10)                     |
| Comorbidity                                                                     |                                           |                                        |                                |                                      |
| 1                                                                               | 0.90 (0.73,1.13)                          | 0.91 (0.73,1.13)                       | 0.90 (0.72,1.13)               | 0.90 (0.72,1.13)                     |
| 2                                                                               | 1.22 (0.98,1.51)                          | 1.22 (0.98,1.51)                       | 1.22 (0.98,1.51)               | 1.22 (0.98,1.51)                     |
| 3 or more                                                                       | 1.00 (0.80,1.26)                          | 1.00 (0.80,1.26)                       | 1.00 (0.79,1.26)               | 1.00 (0.79,1.26)                     |
| Facility is CBOC (vs. not CBOC)                                                 | 0.61 (0.21,1.78)                          | 0.66 (0.23,1.95)                       | 0.55 (0.18,1.64)               | 0.57 (0.19,1.70)                     |
| Total number of patients for site<br>(median centered)                          | 1.00 (1.00,1.00)                          | 1.00 (1.00,1.00)                       | 1.00 (1.00,1.00)               | 1.00 (1.00,1.00)                     |
| Total number of eligible patients on patient list for site<br>(median centered) | 0.99 (0.98,1.01)                          | 0.99 (0.98,1.01)                       | 0.99 (0.98,1.01)               | 0.99 (0.98,1.01)                     |
| Bayesian Information Criterion                                                  | 4873.4                                    | 4875.5                                 | 4877.9                         | 4880.8                               |

\* $p < 0.01$
